# Supplementary material for: tRNA Biology in Mitochondria
Source: PubMed Central journal article supplement (PMC4394434; doi:10.3390/ijms16034518), 2015-02-27
Supplement: ijms-16-04518-s001.pdf [file ijms-16-04518-s001.pdf]

## Supplementary Information

**Table S1.** Distribution of post-transcriptional modifications in mt-tRNAs from 10 phyla across phylogeny.

| Nts | I<br>Pro.                                                                                   | II<br>Fun.                    | III<br>Nem.                                                                      | IV<br>Mol.       | V<br>Ech.                                                                                    | VI<br>Ins.                                                             | VII<br>Uro.                                                                 | VIII<br>Bir.     | IX<br>Mam.                                                                                 | X<br>Pla.                            | Σ                                                                                                                                                                                                                     |
|-----|---------------------------------------------------------------------------------------------|-------------------------------|----------------------------------------------------------------------------------|------------------|----------------------------------------------------------------------------------------------|------------------------------------------------------------------------|-----------------------------------------------------------------------------|------------------|--------------------------------------------------------------------------------------------|--------------------------------------|-----------------------------------------------------------------------------------------------------------------------------------------------------------------------------------------------------------------------|
| 6   | –                                                                                           | –                             | –                                                                                | –                | –                                                                                            | –                                                                      | m <sup>2</sup> G                                                            | –                | m <sup>2</sup> G                                                                           | –                                    | m <sup>2</sup> G                                                                                                                                                                                                      |
| 8   | –                                                                                           | –                             | m <sup>1</sup> A                                                                 | –                | –                                                                                            | –                                                                      | –                                                                           | –                | –                                                                                          | –                                    | m <sup>1</sup> A                                                                                                                                                                                                      |
| 9   | –                                                                                           | –                             | m <sup>1</sup> A                                                                 | m <sup>1</sup> A | m <sup>1</sup> A<br>m <sup>1</sup> G                                                         | m <sup>1</sup> A<br>m <sup>1</sup> G                                   | m <sup>1</sup> A                                                            | –                | m <sup>1</sup> A<br>m <sup>1</sup> G                                                       | –                                    | m <sup>1</sup> A, m <sup>1</sup> G                                                                                                                                                                                    |
| 10  | –                                                                                           | m <sup>2</sup> G              | –                                                                                | –                | m <sup>2</sup> G                                                                             | m <sup>2</sup> G                                                       | m <sup>2</sup> G                                                            | –                | m <sup>2</sup> G                                                                           | –                                    | m <sup>2</sup> G                                                                                                                                                                                                      |
| 13  | –                                                                                           | –                             | –                                                                                | –                | D                                                                                            | –                                                                      | –                                                                           | –                | –                                                                                          | Ψ                                    | Ψ                                                                                                                                                                                                                     |
| 15  | –                                                                                           | D                             | –                                                                                | –                | –                                                                                            | –                                                                      | –                                                                           | –                | –                                                                                          | –                                    | D                                                                                                                                                                                                                     |
| 16  | D                                                                                           | –                             | –                                                                                | D                | m <sup>1</sup> A                                                                             | –                                                                      | –                                                                           | –                | –                                                                                          | D                                    | D, m <sup>1</sup> A                                                                                                                                                                                                   |
| 17  | D                                                                                           | –                             | –                                                                                | –                | –                                                                                            | –                                                                      | –                                                                           | –                | –                                                                                          | D                                    | D                                                                                                                                                                                                                     |
| 18  | –                                                                                           | –                             | –                                                                                | –                | –                                                                                            | –                                                                      | –                                                                           | –                | –                                                                                          | Gm                                   | Gm                                                                                                                                                                                                                    |
| 20  | D                                                                                           | D                             | –                                                                                | –                | D                                                                                            | –                                                                      | –                                                                           | –                | D                                                                                          | –                                    | D                                                                                                                                                                                                                     |
| 20a | –                                                                                           | D                             | –                                                                                | –                | –                                                                                            | –                                                                      | –                                                                           | –                | –                                                                                          | D                                    | D                                                                                                                                                                                                                     |
| 20b | –                                                                                           | –                             | –                                                                                | –                | –                                                                                            | –                                                                      | –                                                                           | –                | –                                                                                          | acp <sup>3</sup> U                   | acp <sup>3</sup> U                                                                                                                                                                                                    |
| 25  | –                                                                                           | –                             | –                                                                                | Ψ                | –                                                                                            | –                                                                      | Ψ                                                                           | –                | –                                                                                          | –                                    | Ψ                                                                                                                                                                                                                     |
| 26  | m <sup>2</sup> G<br>m <sup>2</sup> <sub>2</sub> G                                           | m <sup>2</sup> <sub>2</sub> G | m <sup>2</sup> G<br>m <sup>2</sup> <sub>2</sub> G, Ψ                             | –                | –                                                                                            | Ψ                                                                      | –                                                                           | –                | m <sup>2</sup> G<br>m <sup>2</sup> <sub>2</sub> G                                          | –                                    | m <sup>2</sup> G<br>m <sup>2</sup> <sub>2</sub> G, Ψ                                                                                                                                                                  |
| 27  | Ψ                                                                                           | –                             | Ψ                                                                                | Ψ                | Ψ                                                                                            | Ψ                                                                      | Ψ                                                                           | Ψ                | Ψ                                                                                          | Ψ                                    | Ψ                                                                                                                                                                                                                     |
| 28  | –                                                                                           | –                             | Ψ                                                                                | –                | Ψ                                                                                            | Ψ                                                                      | –                                                                           | –                | Ψ                                                                                          | –                                    | Ψ                                                                                                                                                                                                                     |
| 29  | –                                                                                           | Ψ                             | Ψ, t <sup>6</sup> A                                                              | –                | –                                                                                            | –                                                                      | –                                                                           | –                | Ψ                                                                                          | –                                    | Ψ, t <sup>6</sup> A                                                                                                                                                                                                   |
| 31  | Ψ                                                                                           | Ψ                             | Ψ                                                                                | –                | –                                                                                            | Ψ                                                                      | –                                                                           | –                | Ψ                                                                                          | –                                    | Ψ                                                                                                                                                                                                                     |
| 32  | Ψm Cm                                                                                       | Ψ                             | Ψ                                                                                | Ψ                | Ψ, m <sup>3</sup> C,<br>m <sup>5</sup> C                                                     | Ψ                                                                      | Ψ                                                                           | –                | Ψ, m <sup>3</sup> C                                                                        | –                                    | Ψ, m <sup>3</sup> C, Cm                                                                                                                                                                                               |
| 33  | s <sup>2</sup> U                                                                            | –                             | –                                                                                | –                | –                                                                                            | –                                                                      | –                                                                           | –                | –                                                                                          | –                                    | s <sup>2</sup> U                                                                                                                                                                                                      |
| 34  | Ψ, t <sup>6</sup> A<br>cmnm <sup>5</sup> U<br>cmnm <sup>5</sup> s <sup>2</sup> U<br>Um, Cm, | cmnm <sup>5</sup> U           | Ψ, f <sup>5</sup> C<br>cmnm <sup>5</sup> U<br>cmnm <sup>5</sup> s <sup>2</sup> U | m <sup>7</sup> G | m <sup>7</sup> G, Q                                                                          | f <sup>5</sup> C, Q                                                    | τm <sup>5</sup> U<br>τm <sup>5</sup> s <sup>2</sup> U<br>(s <sup>2</sup> U) | f <sup>5</sup> C | f <sup>5</sup> C, Q<br>τm <sup>5</sup> U<br>τm <sup>5</sup> s <sup>2</sup> U               | I, k <sup>2</sup> C                  | Ψ, t <sup>6</sup> A, f <sup>5</sup> C,<br>m <sup>7</sup> G, Q,<br>cmnm <sup>5</sup> U,<br>τm <sup>5</sup> s <sup>2</sup> U<br>cmnm <sup>5</sup> s <sup>2</sup> U,<br>τm <sup>5</sup> U<br>Um, Cm, I, k <sup>2</sup> C |
| 35  | –                                                                                           | –                             | –                                                                                | –                | Ψ                                                                                            | –                                                                      | –                                                                           | –                | –                                                                                          | –                                    | Ψ                                                                                                                                                                                                                     |
| 37  | i <sup>6</sup> A<br>t <sup>6</sup> A<br>m <sup>1</sup> G                                    | i <sup>6</sup> A              | ms <sup>2</sup> i <sup>6</sup> A<br>m <sup>1</sup> G<br>t <sup>6</sup> A         | t <sup>6</sup> A | i <sup>6</sup> A<br>t <sup>6</sup> A,<br>m <sup>6</sup> t <sup>6</sup> A<br>m <sup>1</sup> G | i <sup>6</sup> A, t <sup>6</sup> A<br>ms <sup>2</sup> i <sup>6</sup> A | ms <sup>2</sup> i <sup>6</sup> A                                            | –                | i <sup>6</sup> A, t <sup>6</sup> A<br>ms <sup>2</sup> i <sup>6</sup> A<br>m <sup>1</sup> G | m <sup>6</sup> A<br>m <sup>1</sup> G | i <sup>6</sup> A, m <sup>6</sup> A, t <sup>6</sup> A,<br>m <sup>6</sup> t <sup>6</sup> A, ms <sup>2</sup> i <sup>6</sup> A,<br>m <sup>1</sup> G                                                                       |

Table S1. Cont.

| Nts        | I<br>Pro.         | II<br>Fun. | III<br>Nem. | IV<br>Mol.       | V<br>Ech.                           | VI<br>Ins.                | VII<br>Uro. | VIII<br>Bir. | IX<br>Mam.       | X<br>Pla.          | Σ                                   |
|------------|-------------------|------------|-------------|------------------|-------------------------------------|---------------------------|-------------|--------------|------------------|--------------------|-------------------------------------|
| 38         | –                 | –          | –           | –                | Ψ, ms <sup>2</sup> i <sup>6</sup> A | Ψ                         | Ψ           | –            | –                | Ψ                  | Ψ, ms <sup>2</sup> i <sup>6</sup> A |
| 39         | Ψ, Ψ <sub>m</sub> | Ψ          | –           | Ψ                | Ψ                                   | Ψ, Ψ <sub>m</sub> ,<br>Cm | Ψ           | –            | Ψ                | Ψ                  | Ψ, Ψ <sub>m</sub> , Cm              |
| 40         | –                 | Ψ          | –           | –                | Ψ                                   | –                         | Ψ           | –            | Ψ                | –                  | Ψ                                   |
| 41         | Ψ                 | Ψ          | –           | –                | –                                   | Ψ                         | –           | –            | –                | –                  | Ψ                                   |
| 44         | Um                | Um         | –           | –                | –                                   | Ψ                         | –           | –            | –                | Um                 | Um                                  |
| 45         | –                 | –          | –           | –                | –                                   | D                         | –           | –            | –                | –                  | D                                   |
| 46         | –                 | –          | –           | m <sup>7</sup> G | –                                   | –                         | –           | –            | –                | m <sup>7</sup> G   | m <sup>7</sup> G                    |
| 47         | –                 | –          | –           | D                | –                                   | –                         | –           | –            | –                | acp <sup>3</sup> U | D, acp <sup>3</sup> U               |
| 48         | –                 | –          | –           | m <sup>5</sup> C | –                                   | –                         | –           | –            | m <sup>5</sup> C | –                  | m <sup>5</sup> C                    |
| 49         | m <sup>5</sup> C  | –          | –           | –                | –                                   | –                         | –           | –            | m <sup>5</sup> C | m <sup>5</sup> C   | m <sup>5</sup> C                    |
| 50         | –                 | –          | –           | –                | –                                   | –                         | –           | –            | Ψ                | –                  | Ψ                                   |
| 54         | T                 | T          | –           | T                | Ψ                                   | –                         | –           | T            | –                | T                  | T, Ψ                                |
| 55         | Ψ                 | Ψ          | –           | Ψ                | Ψ                                   | –                         | –           | Ψ            | Ψ                | Ψ                  | Ψ                                   |
| 57         | –                 | –          | –           | –                | m <sup>1</sup> A                    | –                         | –           | –            | Ψ                | –                  | Ψ                                   |
| 58         | –                 | –          | –           | –                | –                                   | –                         | –           | –            | m <sup>1</sup> A | m <sup>1</sup> A   | m <sup>1</sup> A                    |
| 64         | –                 | –          | –           | –                | –                                   | –                         | Ψ           | –            | –                | –                  | Ψ                                   |
| 65         | –                 | –          | –           | –                | –                                   | Ψ                         | –           | –            | –                | –                  | Ψ                                   |
| 66         | –                 | –          | –           | –                | –                                   | Ψ                         | –           | –            | –                | –                  | Ψ                                   |
| 67         | –                 | –          | –           | m <sup>2</sup> G | –                                   | Ψ                         | –           | –            | Ψ                | –                  | m <sup>2</sup> G, Ψ                 |
| 68         | –                 | –          | –           | –                | –                                   | Ψ                         | –           | –            | –                | –                  | Ψ                                   |
| 70         | –                 | –          | Ψ           | –                | –                                   | –                         | –           | –            | –                | –                  | Ψ                                   |
| 71         | –                 | –          | Ψ           | –                | –                                   | –                         | –           | –            | –                | –                  | Ψ                                   |
| 72         | –                 | –          | –           | m <sup>5</sup> C | –                                   | –                         | –           | –            | m <sup>5</sup> C | –                  | m <sup>5</sup> C                    |
| Nb<br>Seq. | 4                 | 25         | 10          | 4                | 7                                   | 16                        | 6           | 1            | 35               | 15                 | 123                                 |

Most data are retrieved from *tRNADB* data base [125] and additional data (in blue) are taken from refs [50,108,193,194,1,2]. The number of RNA sequences of mt-tRNAs investigated in 10 eukaryotic phyla is indicated. Modified nucleosides (nts) are found in Acceptor stem (nts 6 and 66–72), D-arm with connecting residues (nts 8–26), Anticodon loop (nts 32–38, on yellow background), Anticodon stem (nts 27–31 and 39–41, on light yellow background), Variable region (nts 44–48) and T-arm (nts 49–65); I Pro., unicellular protozoans including alveolates, amoebas and euglenes (F, K, L, W, Y; *Leishmania tarentolae*, *Tetrahymena pyriformis*, *T. thermophila*, *Trypanosoma brucei*); II Fun., fungi (All but five—*C*, *D*, *E*, *N*; *Neurospora crassa*, *Saccharomyces cerevisiae*); III Nem., nematodes (F, E, K, L, M, Q, R, S, W; *Ascaris suum*); IV Mol., molluscs (K, S; *Loligo bleckeri*); V Ech., echinoderms (D, H, K, N, S, Y; *Asterias amurensis*); VI Ins., insects (D, E, G, I, K, M, N, Q, R, S, V, W; *Aedes albopictus*, *Drosophila melanogaster*); VII Uro., urochordates (G, M, W; *Halocynthia roretzi*); VIII Bir., birds (M; *Gallus gallus*); IX Mam., mammals (All; *Bos taurus*, *Didelphis virginiana*, *Homo sapiens*, *Mesocricetus auratus*, *Rattus norvegicus*); X Pla., plants (F, I, L, M, P, R, W, Y; *Oenothera*, *Phaseolus vulgaris*, *Physcomitrella patens*, *Solanum tuberosum*, *Triticum aestivum*). Σ The represented coding specificities are indicated by the amino acid one-letter code (missing specificities are in italics) and are scattered in the indicated species. § Data on *T. brucei* mt-tRNAs (K, L, W) [50] concern imported tRNAs modified in mitochondria to Cm32.

## References

1. Tomita, K.; Ueda, T.; Watanabe, K. 7-Methylguanosine at the anticodon wobble position of squid mitochondrial tRNA<sup>Ser(GCU)</sup>: Molecular basis for assignment of AGA/AGG codons as serine in invertebrate mitochondria. *Biochim. Biophys. Acta* **1998**, *1399*, 78–82.
2. Tomita, K.; Ueda, T.; Ishiwa, S.; Crain, P.F.; McCloskey, J.A.; Watanabe, K. Codon reading patterns in *Drosophila melanogaster* mitochondria based on their tRNA sequences: A unique wobble rule in animal mitochondria. *Nucleic Acids Res.* **1999**, *27*, 4291–4297.
